# Supplementary material for: Increasing Dietary Medium-Chain Fatty Acid Ratio Mitigates High-fat Diet-Induced Non-Alcoholic Steatohepatitis by Regulating Autophagy
Source: PubMed Central journal article supplement (PMC5656678; doi:10.1038/s41598-017-14376-y), 2017-10-25
Supplement: 41598_2017_14376_MOESM1_ESM.pdf [file 41598_2017_14376_MOESM1_ESM.pdf]

# **Increasing Dietary Medium-Chain Fatty Acid Ratio Mitigates High-fat Diet-Induced Non-Alcoholic Steatohepatitis by Regulating Autophagy**

Mu-En Wang<sup>1, 2</sup>, Brijesh K. Singh<sup>2</sup>, Meng-Chieh Hsu<sup>1</sup>, Chien Huang<sup>1</sup>, Paul M. Yen<sup>2</sup>,  
Leang-Shin Wu<sup>1</sup>, De-Shien Jong<sup>1</sup>, and Chih-Hsien Chiu<sup>1, \*</sup>

<sup>1</sup>Laboratory of Animal Physiology, Department of Animal Science and Technology, National Taiwan University, Taipei 10617, Taiwan.

<sup>2</sup>Laboratory of Hormonal Regulation, Cardiovascular and Metabolic Disorders Program, Duke-National University of Singapore Graduate Medical School, Singapore 16987, Singapore.

**\*Corresponding Author: Chih-Hsien Chiu**

Address: 50, Lane 155, Sec 3, Keelung Rd., 106 Taipei, Taiwan

Tel.: +886-2-3366-4171; Fax: +886-2-3366-4070 [chiuchihhsien@ntu.edu.tw](mailto:chiuchihhsien@ntu.edu.tw)

## Supplementary Tables

**Table 1. Antibodies used in Western Blotting and Dot Blotting**

| Antibody Name                                     | Company                   | Product Number |
|---------------------------------------------------|---------------------------|----------------|
| Anti-LC3                                          | Cell Signaling Technology | #2775          |
| Anti-phospho-Akt Ser473                           | Cell Signaling Technology | #4060          |
| Anti-Akt                                          | Cell Signaling Technology | #4691          |
| Anti-CHOP (for <i>in vivo</i> samples)            | Cell Signaling Technology | #5554          |
| Anti-CHOP                                         | Cell Signaling Technology | #2895          |
| Anti-cleaved caspase-3                            | Cell Signaling Technology | #9661          |
| Anti-phospho-mTOR Ser2448                         | Cell Signaling Technology | #5536          |
| Anti-mTOR                                         | Cell Signaling Technology | #2983          |
| Anti-phospho-p70S6K Thr389                        | Cell Signaling Technology | #9234          |
| Anti-p70S6K                                       | Cell Signaling Technology | #2708          |
| Anti-phospho-ULK1 Ser757                          | Cell Signaling Technology | #14202         |
| Anti-phospho-ULK1 Ser555                          | Cell Signaling Technology | #5869          |
| Anti-ULK1                                         | Cell Signaling Technology | #8054          |
| Anti-phospho-AMPK Thr172                          | Cell Signaling Technology | #2535          |
| Anti-AMPK                                         | Cell Signaling Technology | #2532          |
| Anti-Beclin-1                                     | Cell Signaling Technology | #3495          |
| Anti-ATG5                                         | Cell Signaling Technology | #12994         |
| Anti-Rubicon                                      | Cell Signaling Technology | #8465          |
| Anti- $\beta$ -actin (for <i>in vivo</i> samples) | Cell Signaling Technology | #8457          |
| Anti-Collagen I                                   | abcam                     | ab34710        |
| Anti-SQSTM1/p62                                   | abcam                     | ab109012       |
| Anti-phospho-GSK-3 $\beta$ Ser9                   | Cell Signaling Technology | #5558          |
| Anti-GSK-3 $\beta$                                | Cell Signaling Technology | #3915          |
| Anti- $\beta$ -actin                              | Santa Cruz Biotechnology  | sc-47778       |
| Goat anti-rabbit IgG-HRP                          | Santa Cruz Biotechnology  | sc-2004        |
| Goat anti-mouse IgG-HRP                           | Santa Cruz Biotechnology  | sc-2005        |

**Table 2. Primers used in qPCR analyses**

| Gene name         | Forward (5' to 3')      | Reverse (5' to 3')     |
|-------------------|-------------------------|------------------------|
| <i>Map1lc3b</i>   | GGAGCTTTGAACAAAGAGTGGAA | GGTCAGGCACCAGGAACTTG   |
| <i>Sqstm1/p62</i> | CCTTGCCCTACAGCTGAGTC    | CCTCAATGCCTAGAGGGCTG   |
| <i>Ulk1</i>       | AAACATCGTGGCGCTGTATG    | CGCATAGTGTGCAGGTAGTCA  |
| <i>Becn1</i>      | AGGAACTCACAGCTCCATTACT  | ACCATCCTGGCGAGTTTCAAT  |
| <i>Actb</i>       | CACTGTCGAGTCGCGTCCA     | CATCCATGGCGAACTGGTGG   |
| <i>MAP1LC3B</i>   | CCGCACCTTCGAACAAAGAG    | AAGCTGCTTCTCACCCCTTGT  |
| <i>SQSTM1/p62</i> | AGAATCAGCTTCTGGTCCATCG  | TTCTTTTCCCTCCGTGCTCC   |
| <i>ULK1</i>       | AGAACCTCGCCAAGTCTCAG    | ACCGTTGCAGTACTCCATAACC |
| <i>BECN1</i>      | CCAGGAACTCACAGCTCCATT   | TCTGCGAGAGACACCATCCT   |
| <i>RUBCN</i>      | TCTCATGCAAACCTGATGAAC   | AGTTTGTGAAAGACATTTCGG  |
| <i>ACTB</i>       | GAGCACAGAGCCTCGCCTTT    | TCATCATCCATGGTGAGCTGG  |

## Supplementary Figure Legends

**Figure S1.** The full-length blot of p-Akt, Akt presented in Figure 1 of the main text.

**Figure S2.** The full-length blot of collagen I, p-Akt, Akt, SQSTM1/p62, LC3, CHOP, cleaved caspase 3, and  $\beta$ -actin presented in Figure 2 of the main text.

**Figure S3.** The full-length blot of p-Akt, Akt, SQSTM1/p62, LC3, CHOP, cleaved caspase 3, and  $\beta$ -actin presented in Figure 3 of the main text.

**Figure S4.** The full-length blot of p-Akt, Akt, SQSTM1/p62, LC3, CHOP, cleaved caspase 3, and  $\beta$ -actin presented in Figure 4 of the main text.

**Figure S5.** The full-length blot of p-AMPK, AMPK, p-mTOR, mTOR, p-p70S6K, p70S6K, p-ULK1, ULK1, Beclin-1, ATG5, Rubicon, and  $\beta$ -actin presented in Figure 5 of the main text.

**Figure S6.** The full-length blot of EGFP-Rubicon, Rubicon, p-AMPK, AMPK, p-mTOR, mTOR, p-p70S6K, p70S6K, p-ULK1, ULK1, Beclin-1, ATG5, SQSTM1/p62, LC3, and  $\beta$ -actin presented in Figure 6 of the main text.

**Figure S7.** The full-length blot of Rubicon, SQSTM1/p62, LC3, CHOP, cleaved caspase 3, EGFP-Rubicon, p-Akt, Akt, and  $\beta$ -actin presented in Figure 7 of the main text.

**Figure S8.** The free fatty acid levels in mice fed with either CTD, SDHFD, or MCFAD for 16 weeks. Values are mean  $\pm$  SEM. (n=6). \* indicates statistical significance,  $P < 0.05$ . n.s.: no significant difference.

**Figure S9.** The Representative immunoblots and densitometric quantification of phospho-GSK-3 $\beta$  (Ser9) in fat-loaded HepG2 cells treated with or without insulin (**A**), and the calculated insulin-stimulated GSK-3 $\beta$  phosphorylation fold change results (**B**). Values are mean  $\pm$  SEM (n=3). \*, # (vs. BSA treated cells without insulin stimulation), and † (vs. SDF-treated cells without insulin stimulation) indicate statistical significance,  $P < 0.05$ . n.s.: no significant difference.

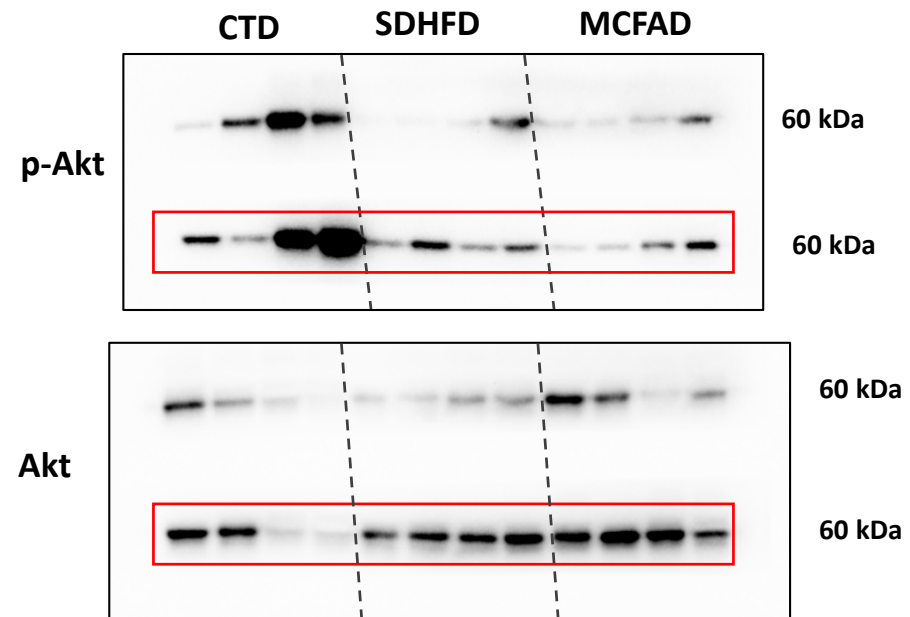

Figure S1

**A**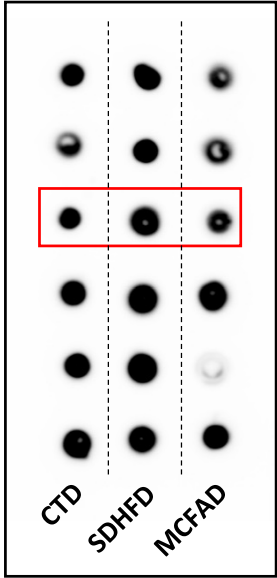**B**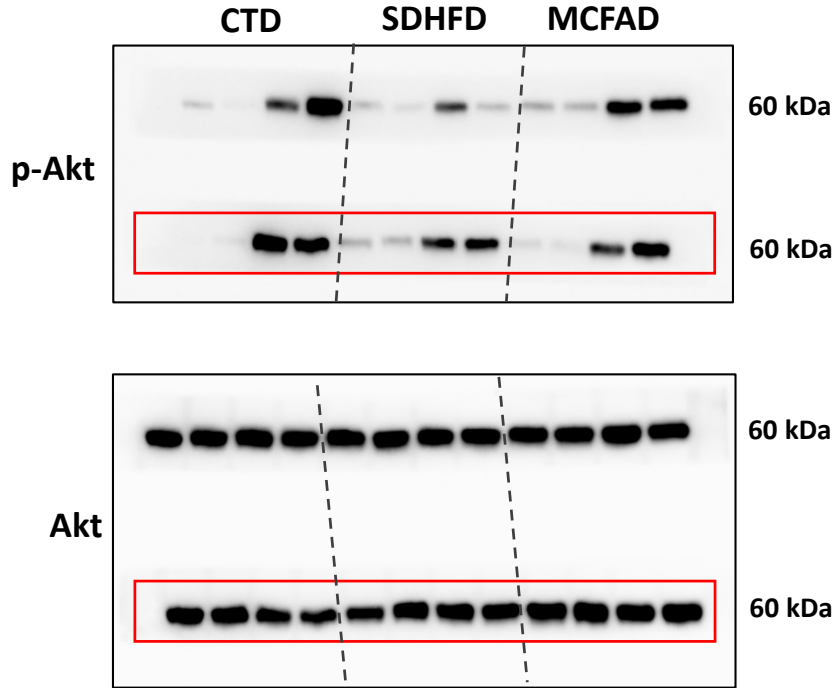**C**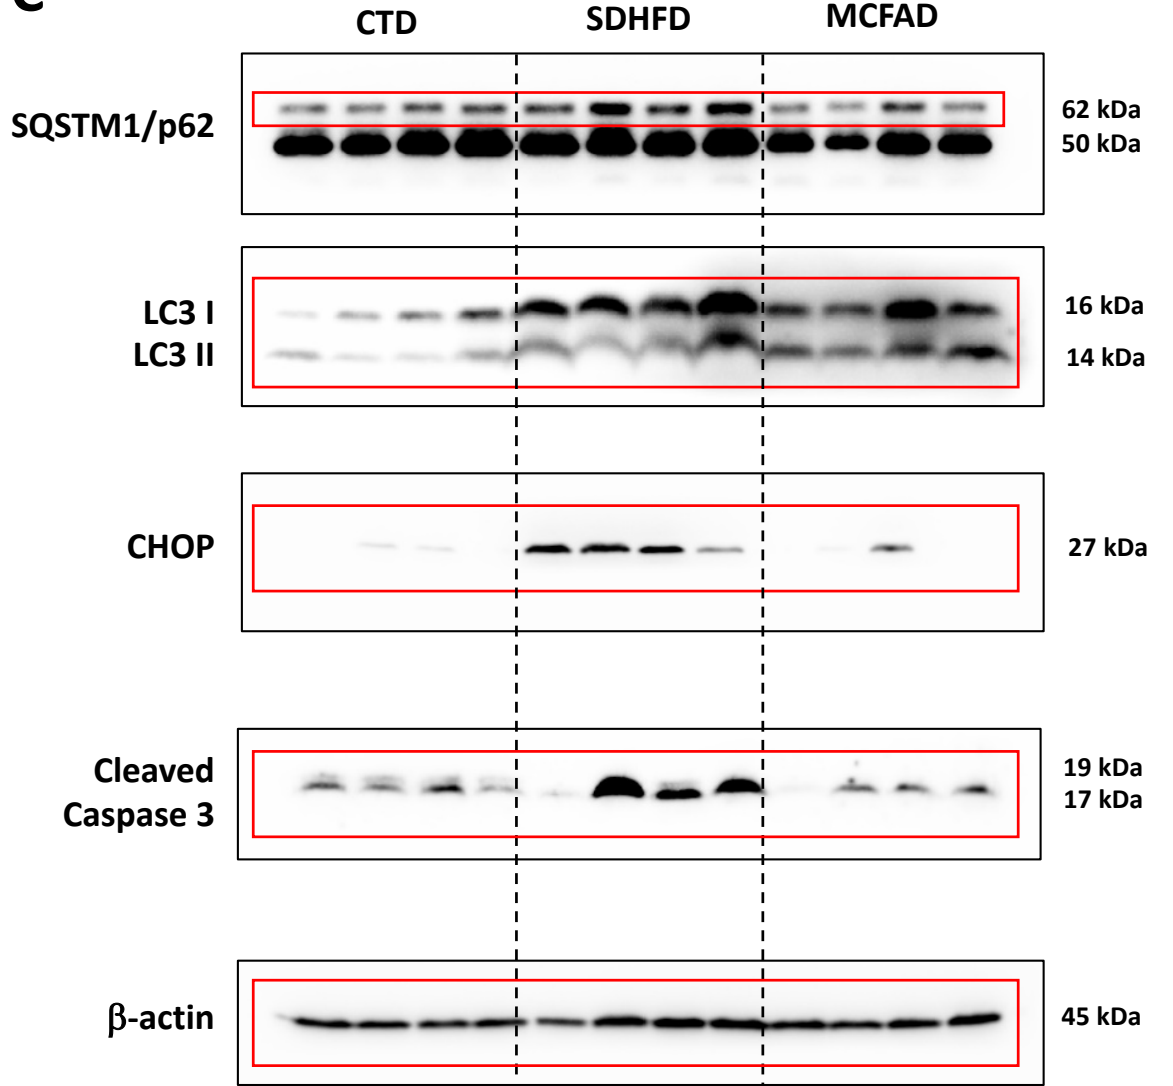

Figure S2

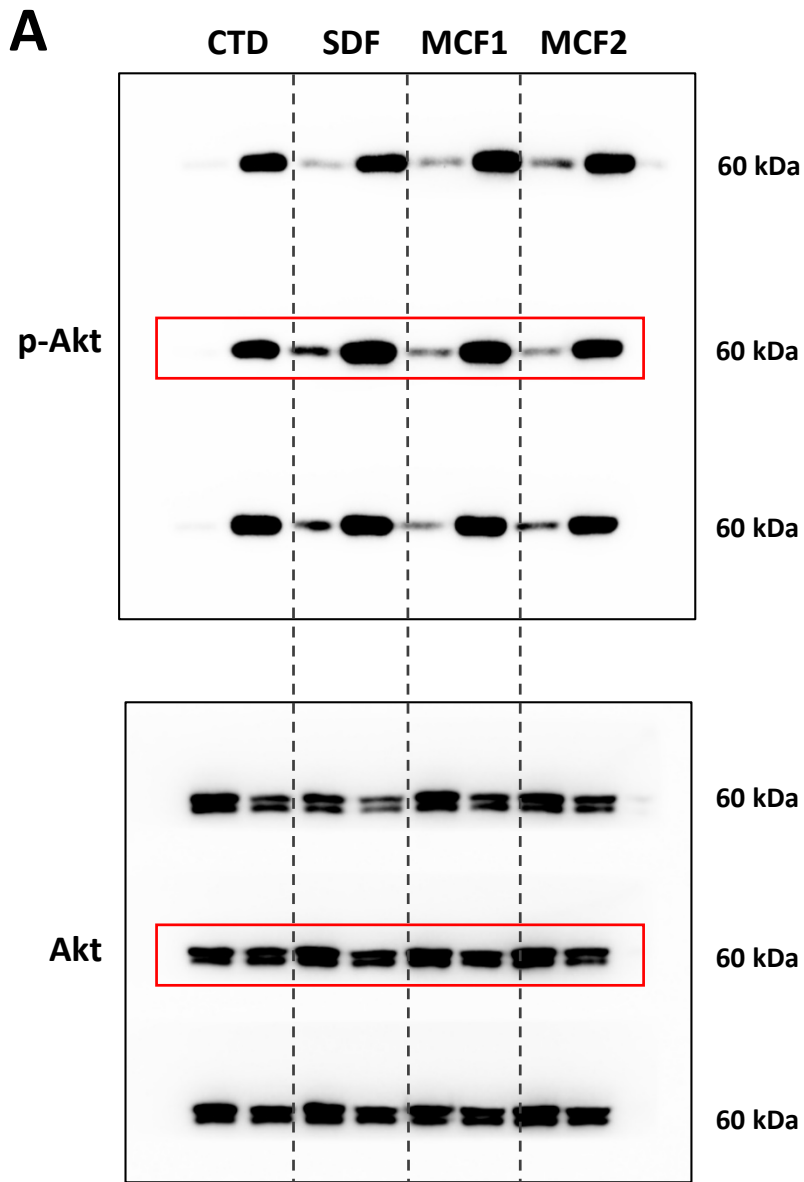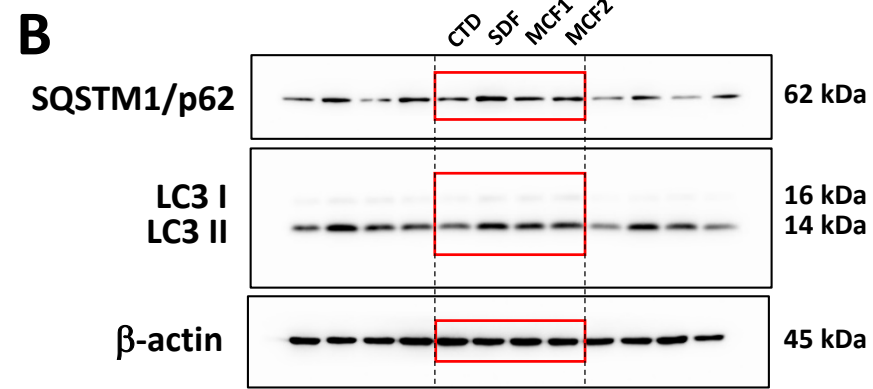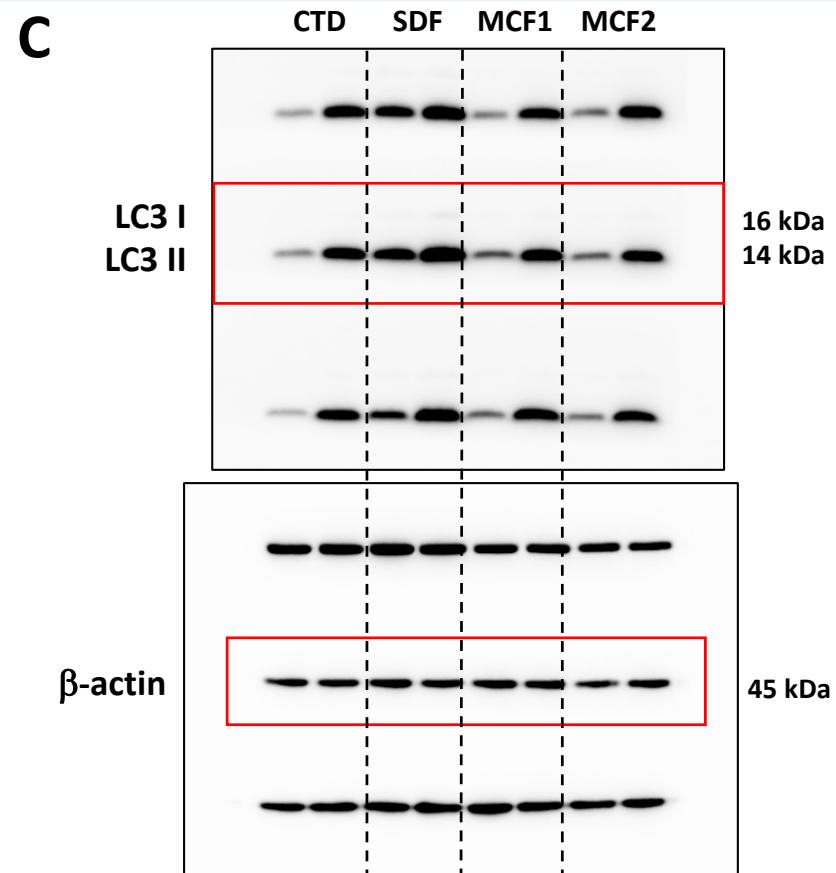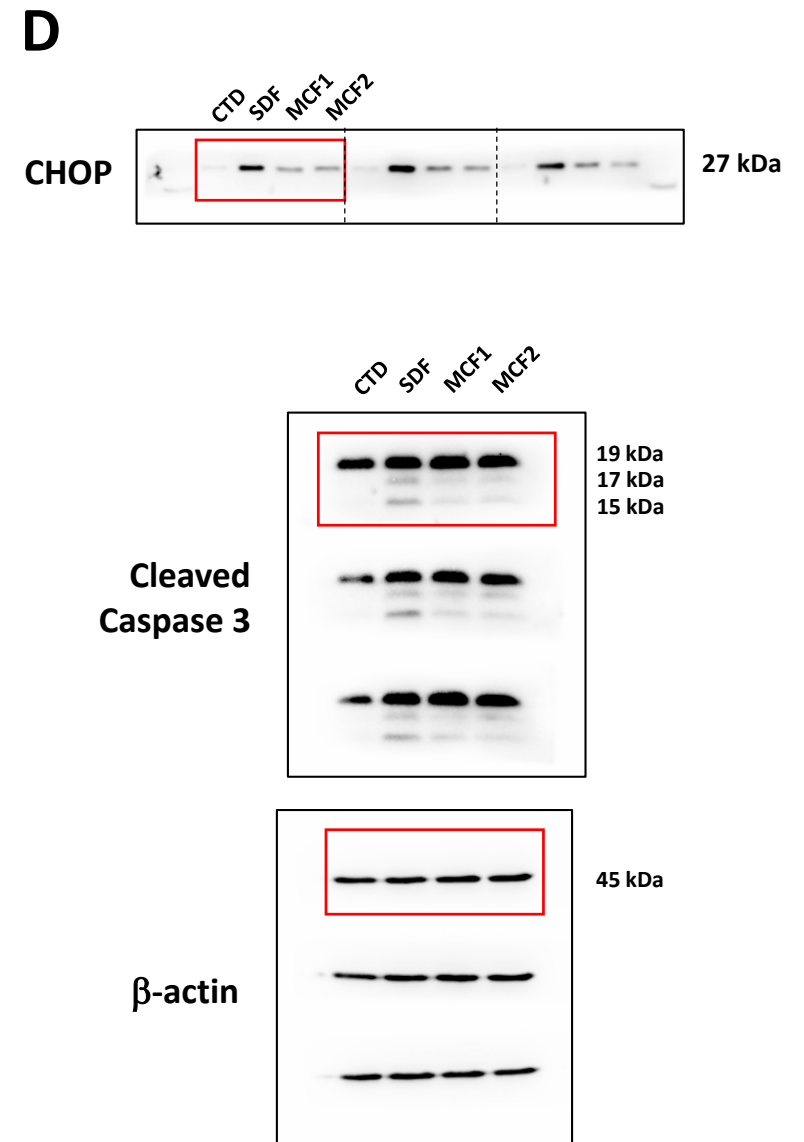

Figure S3

**A**

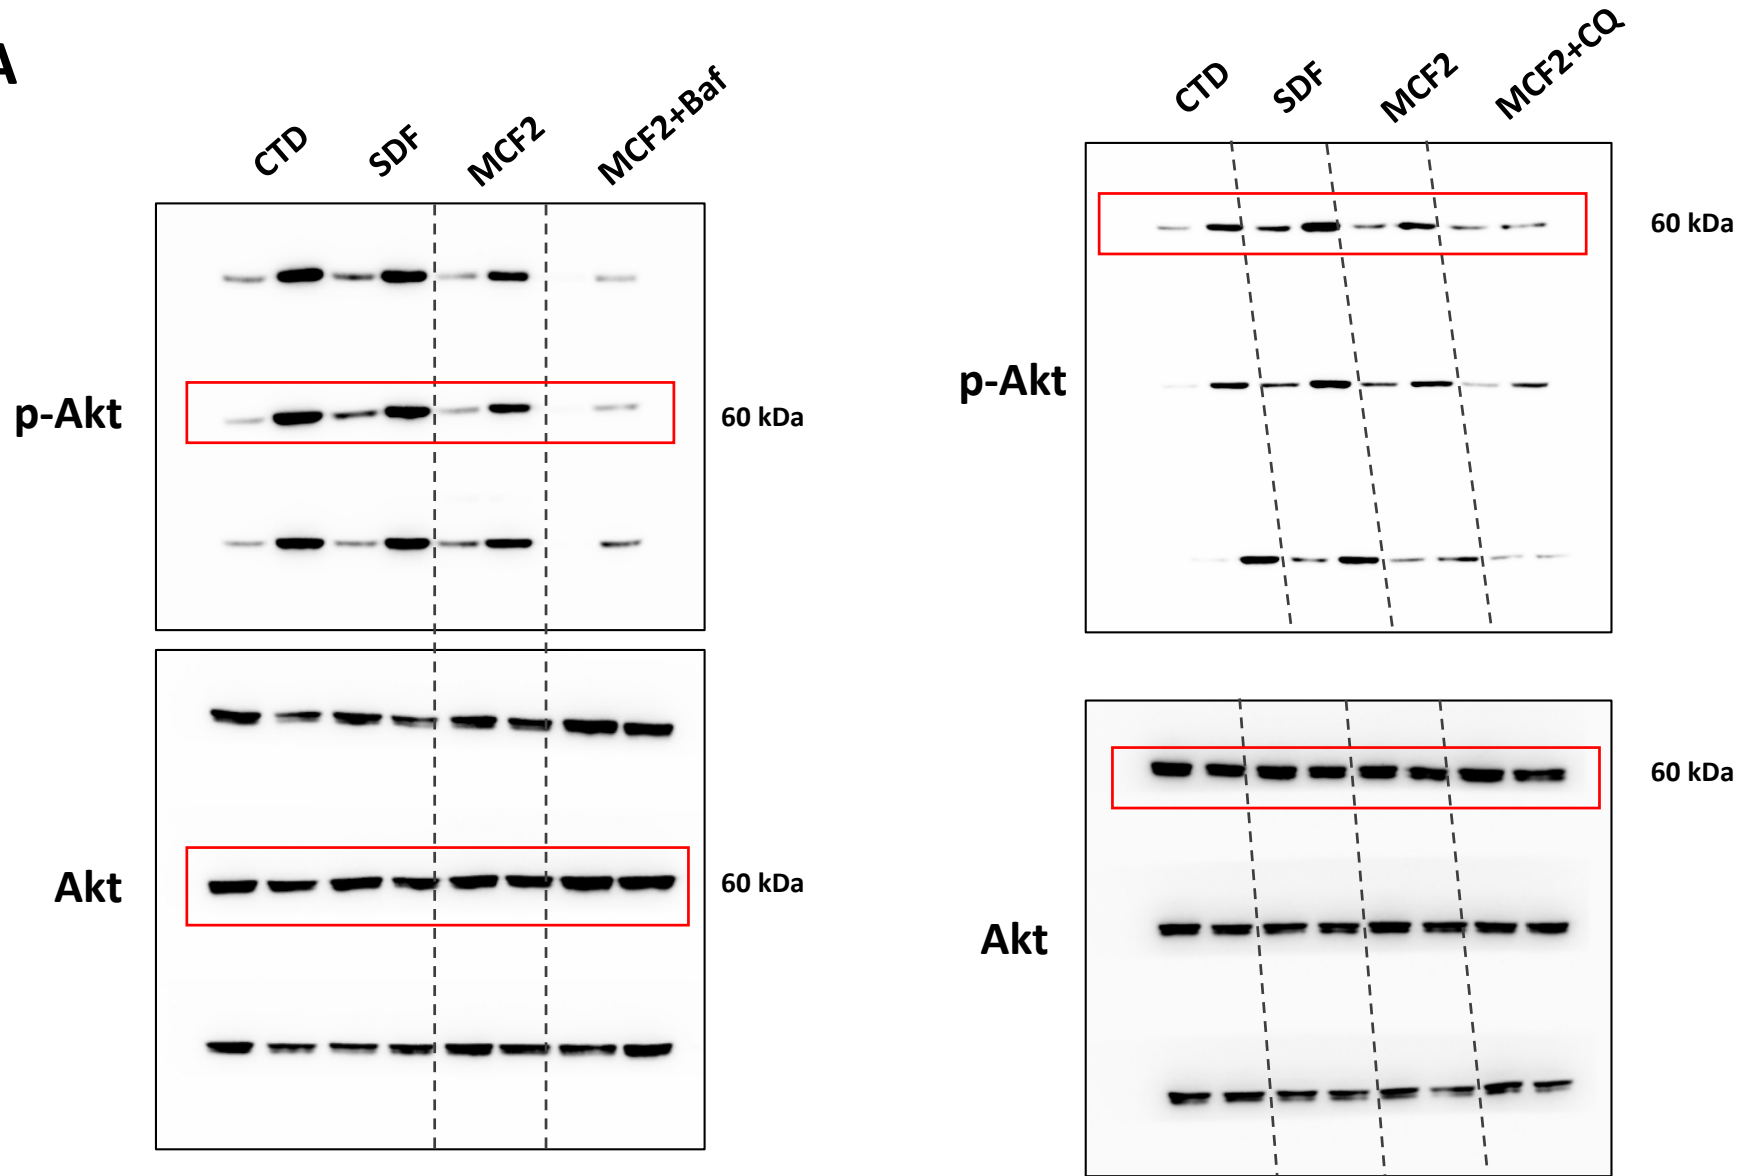

**Figure S4**



**B**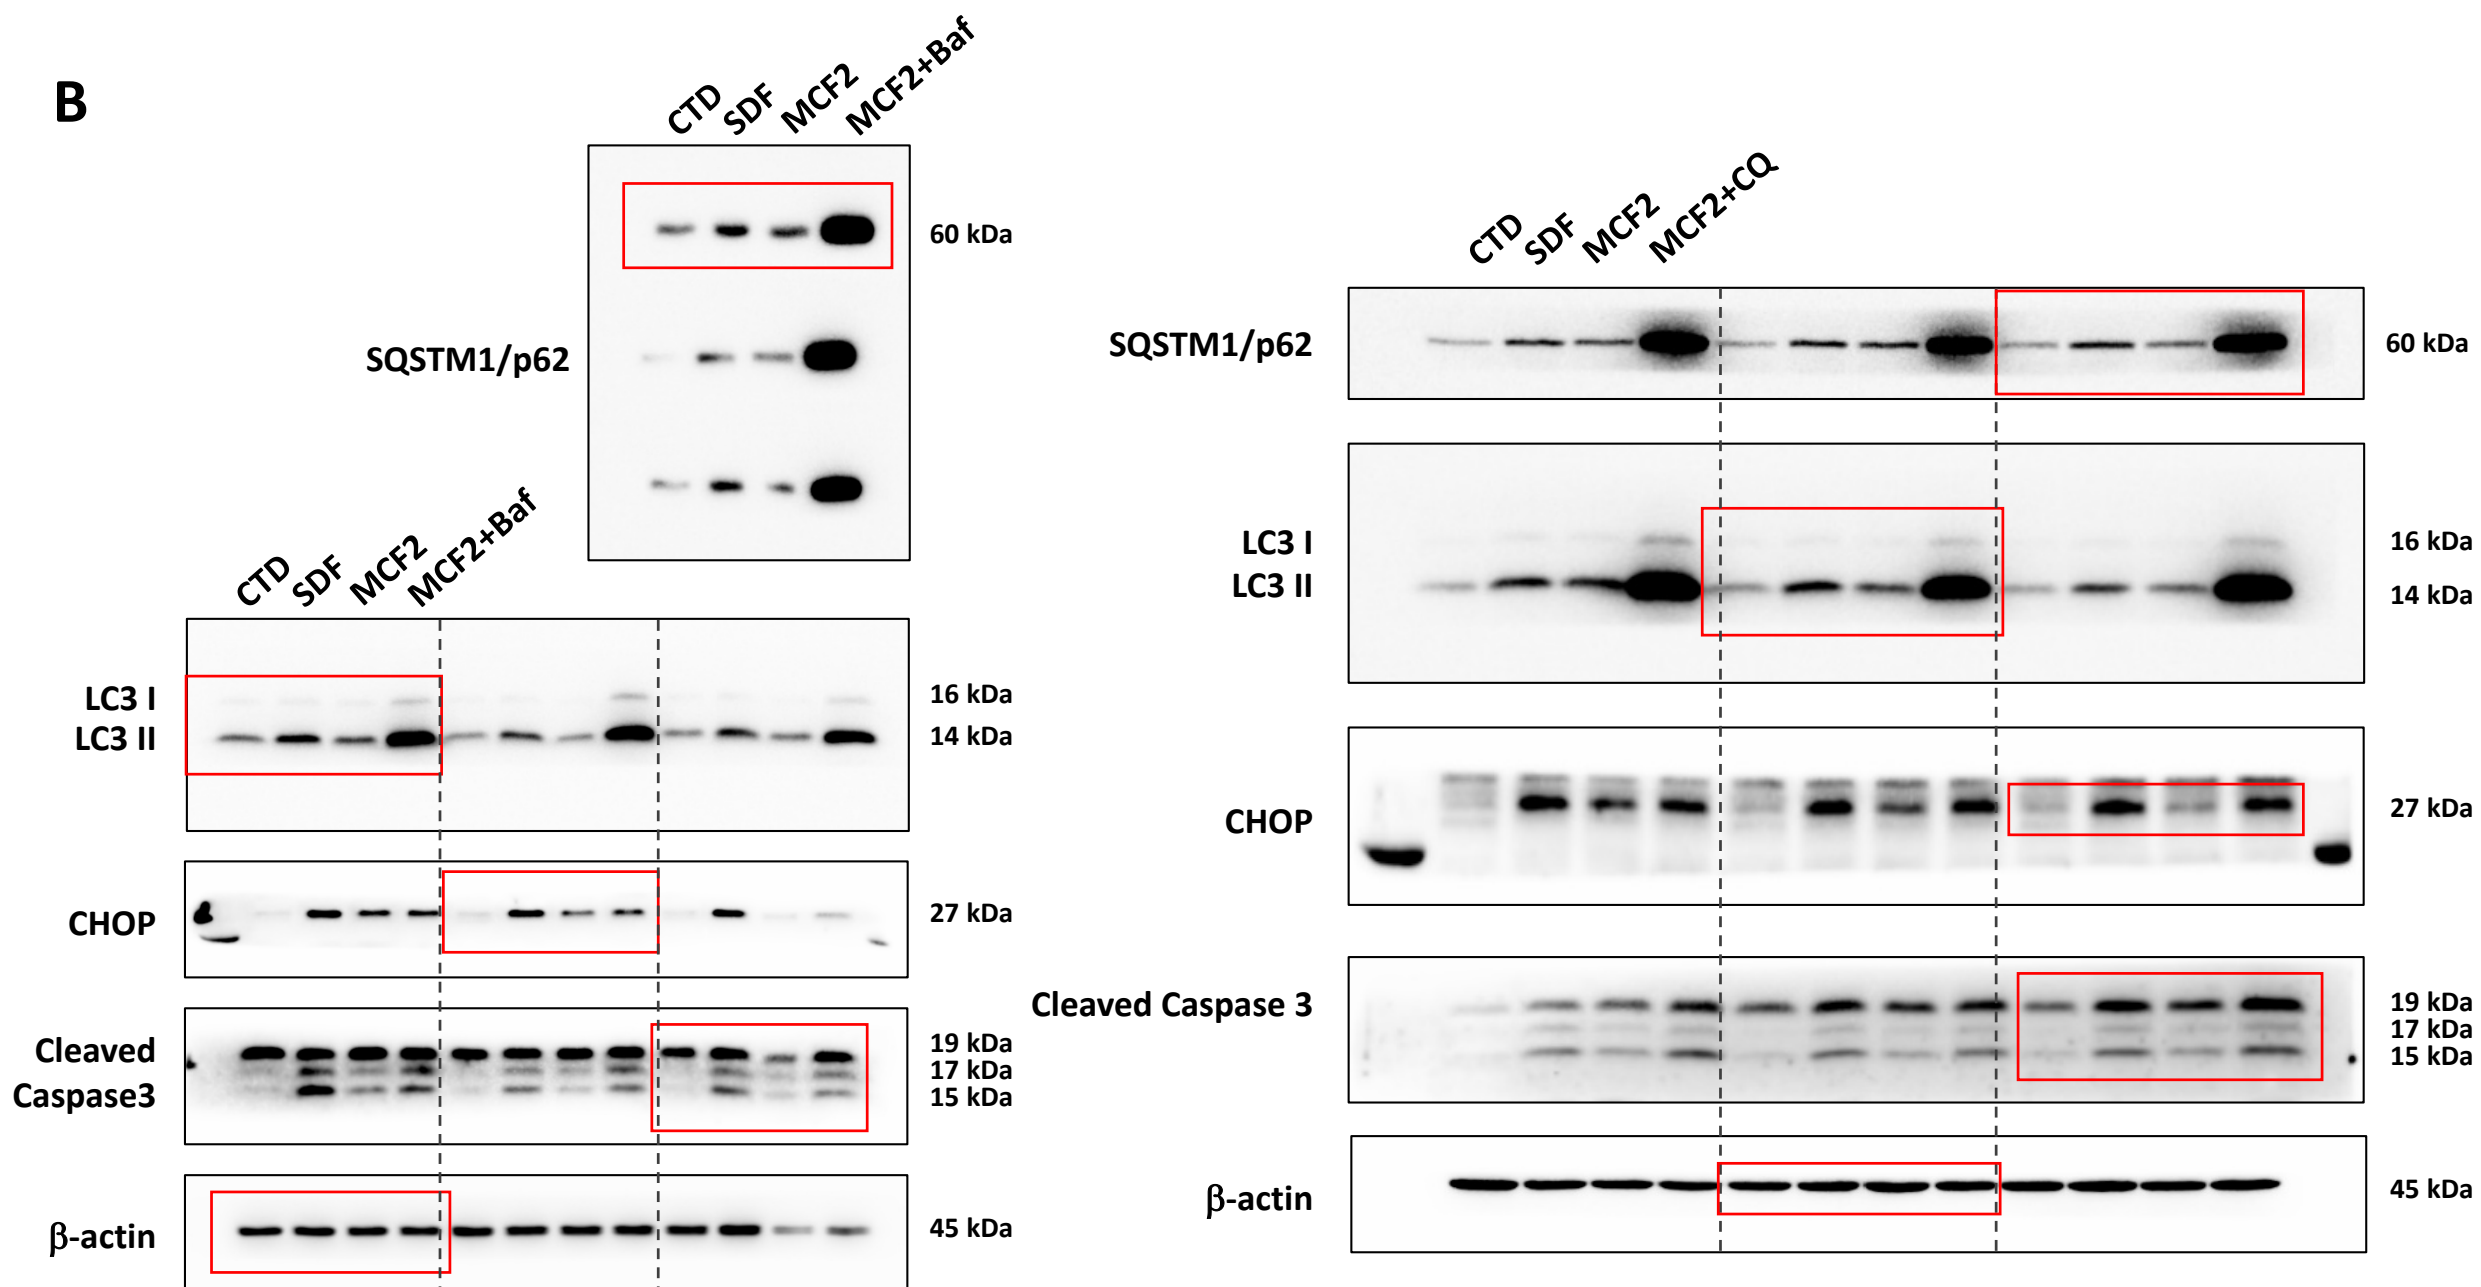**Figure S4 (continued)**

**A**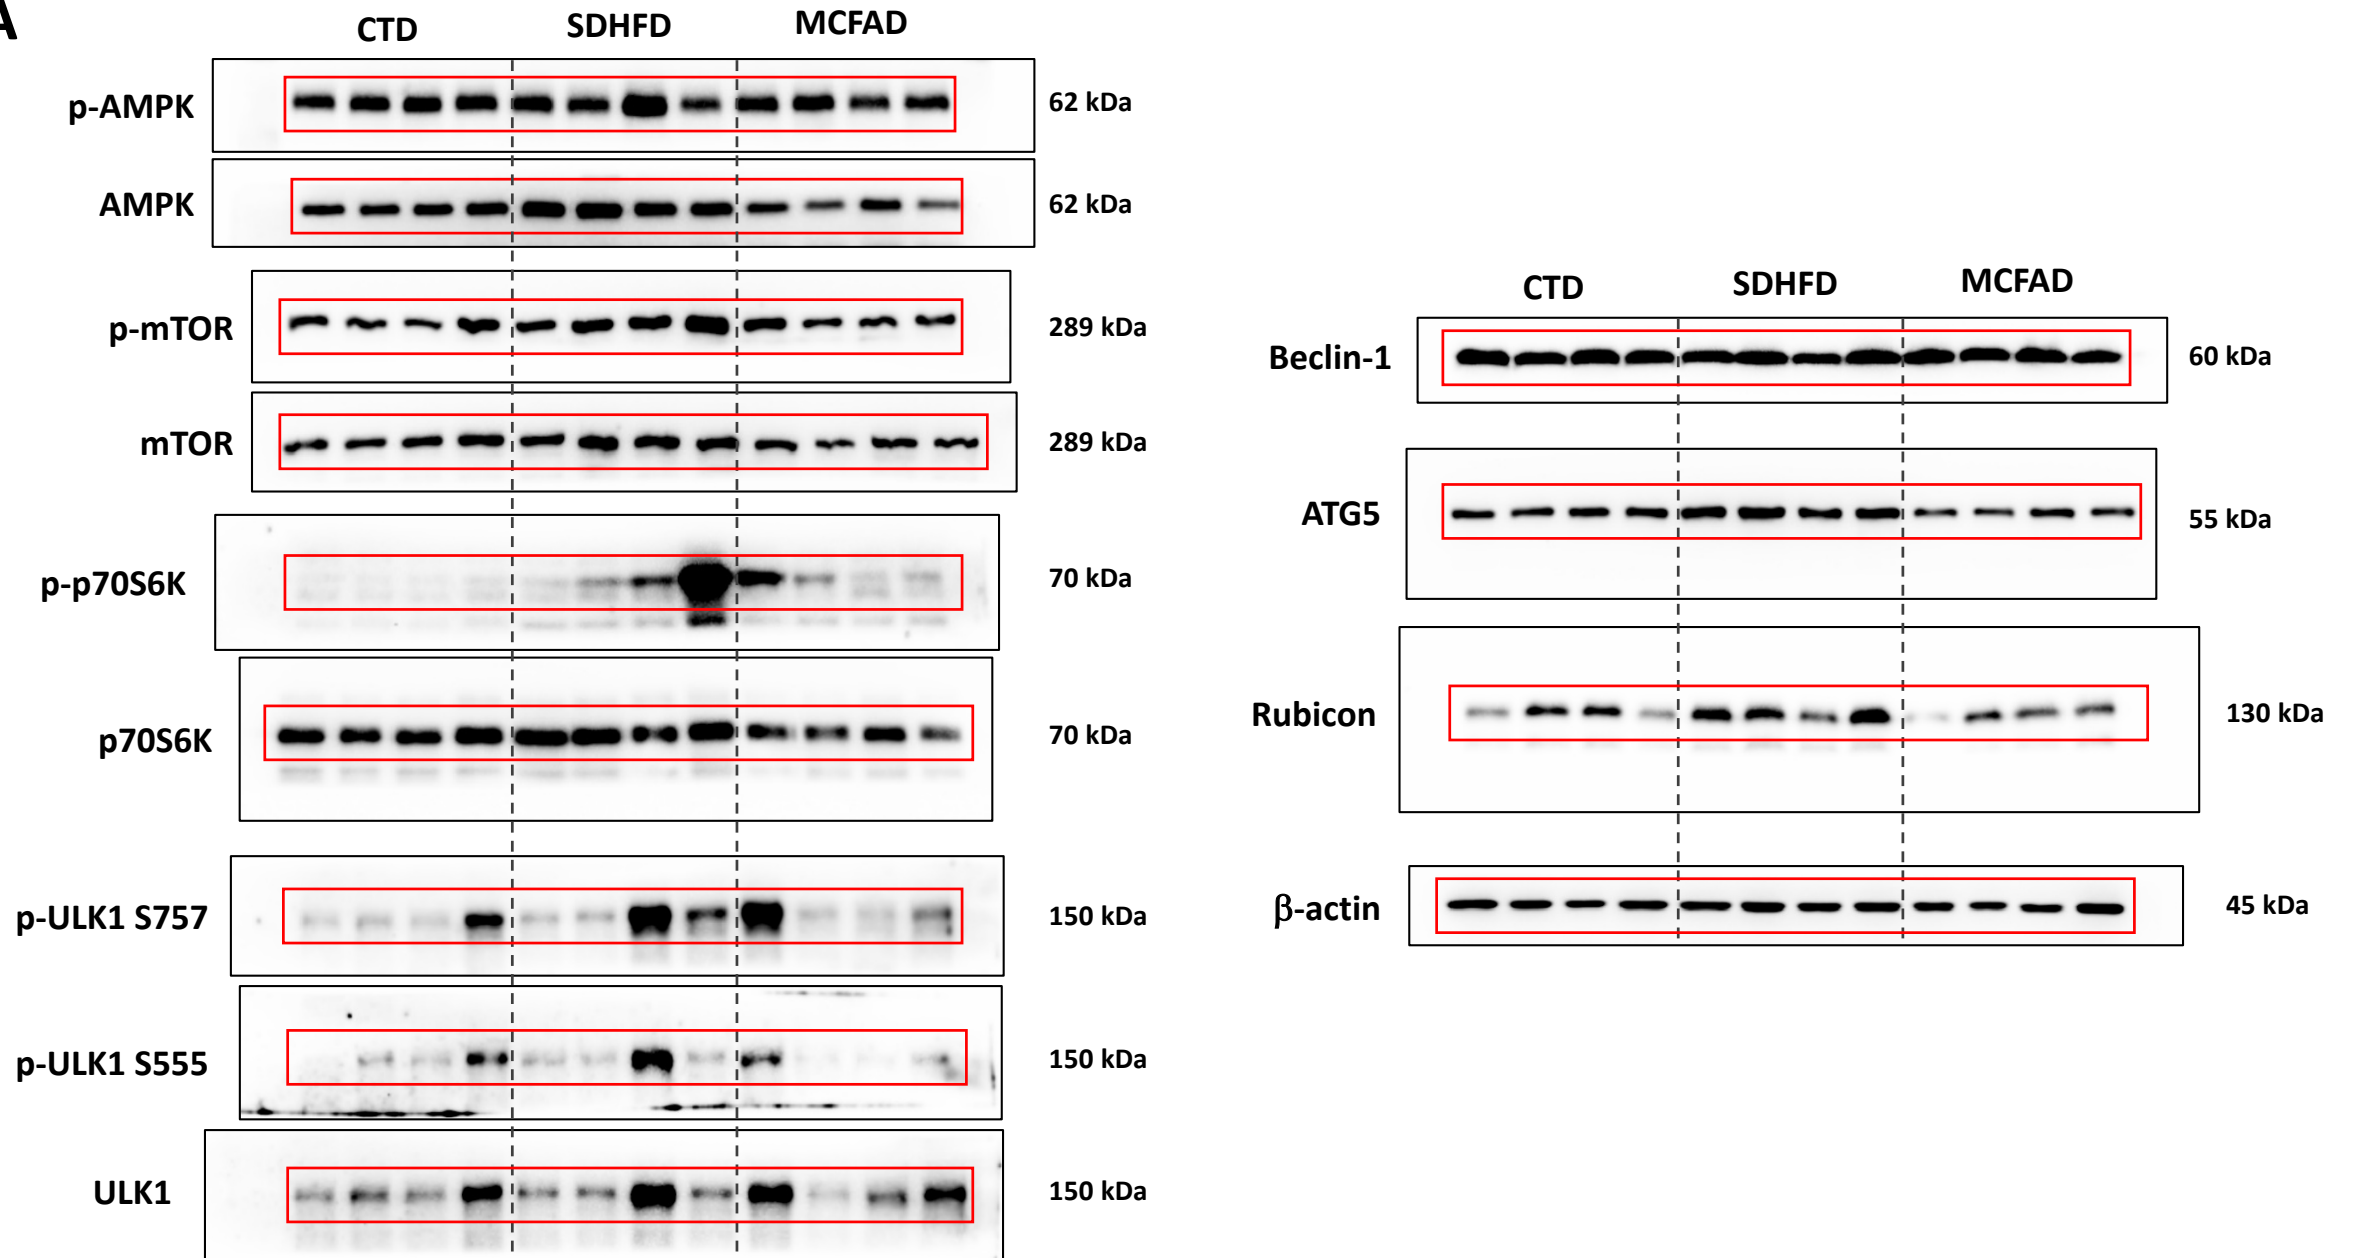**Figure S5**

**B**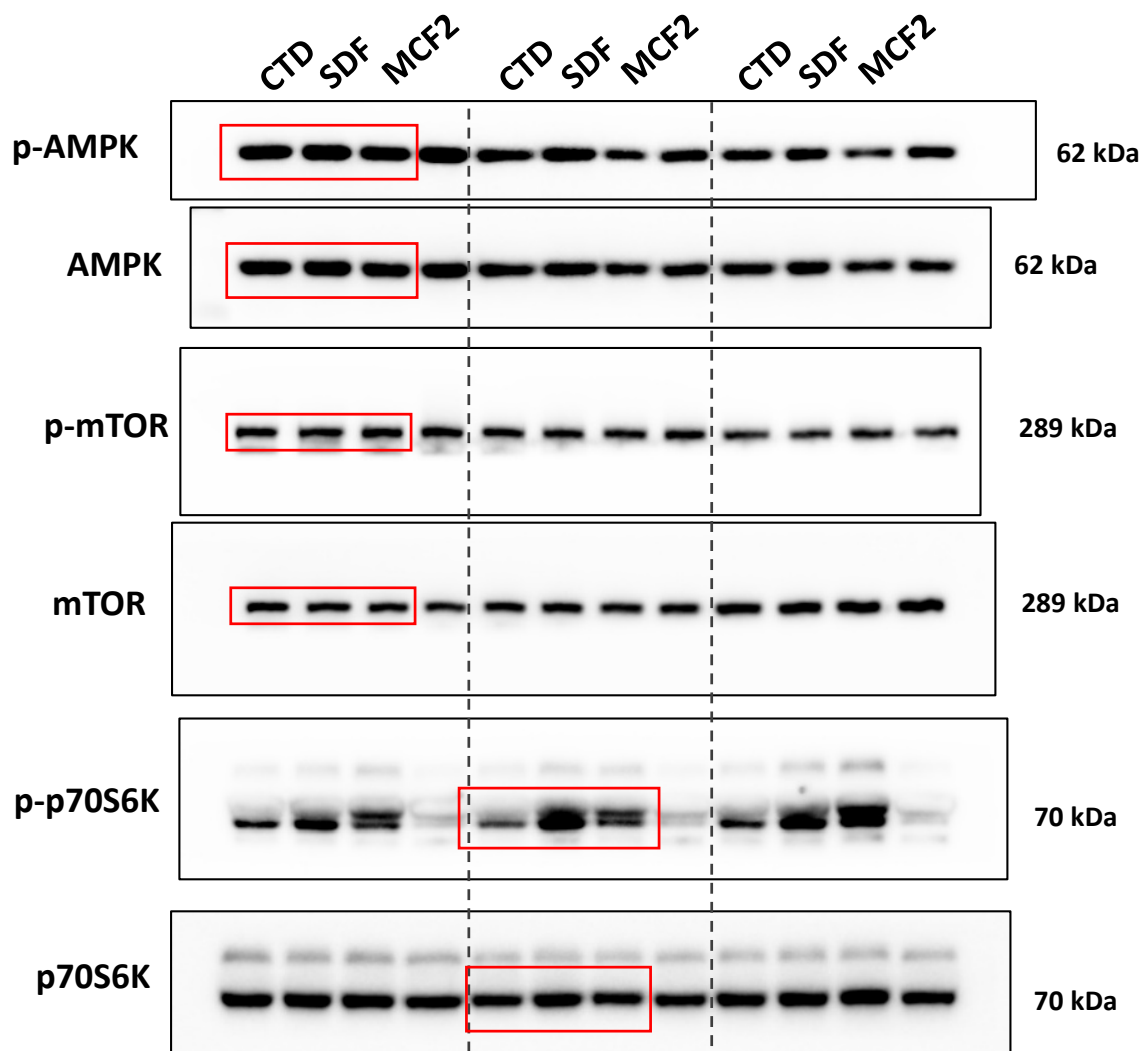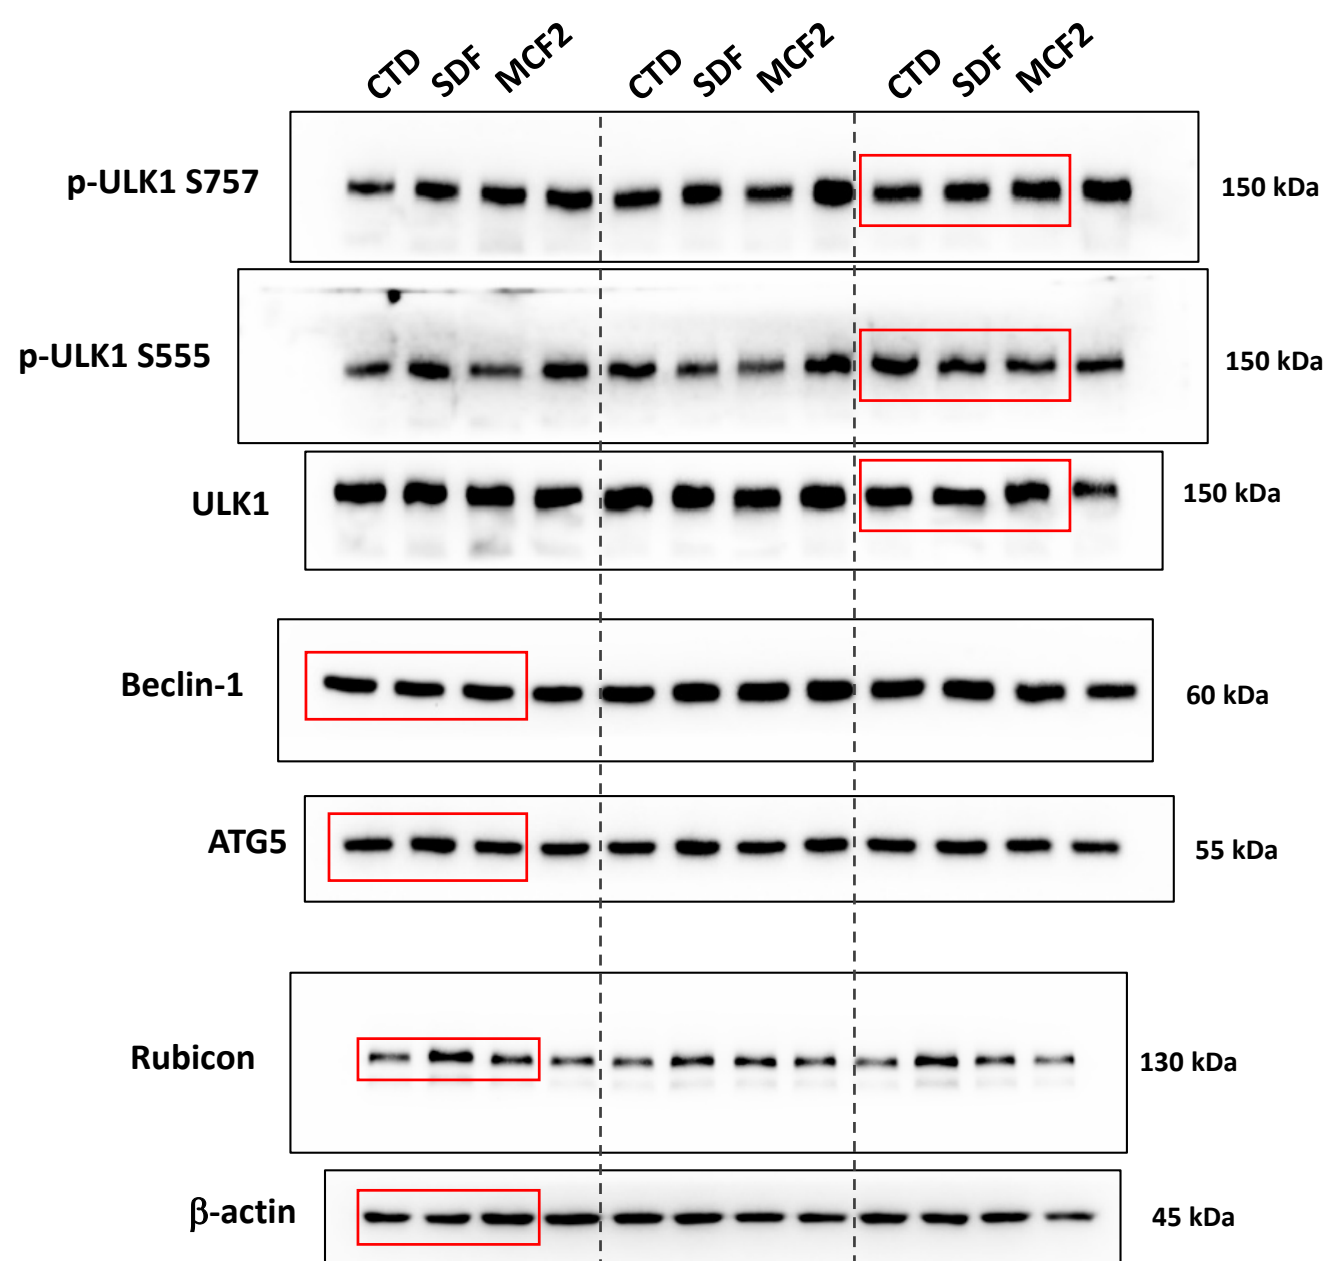**Figure S5 (Continued)**

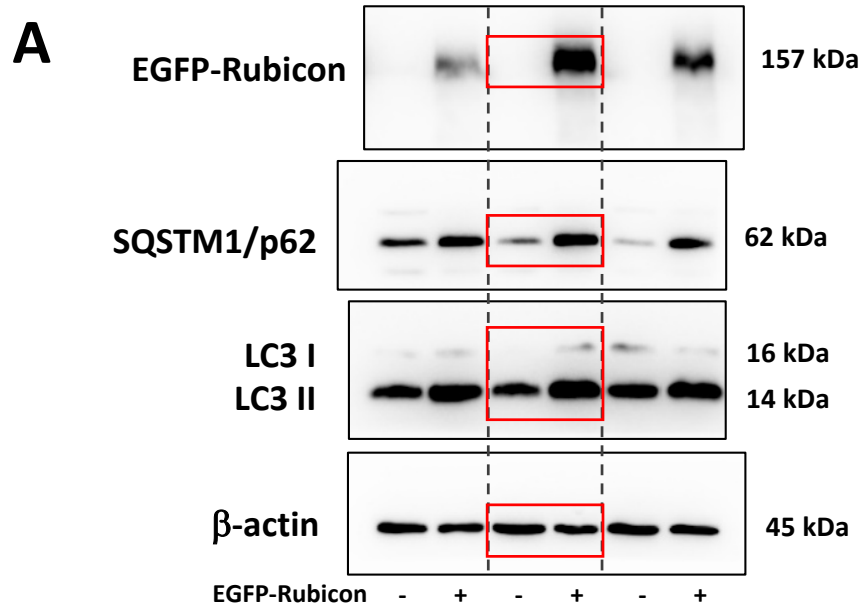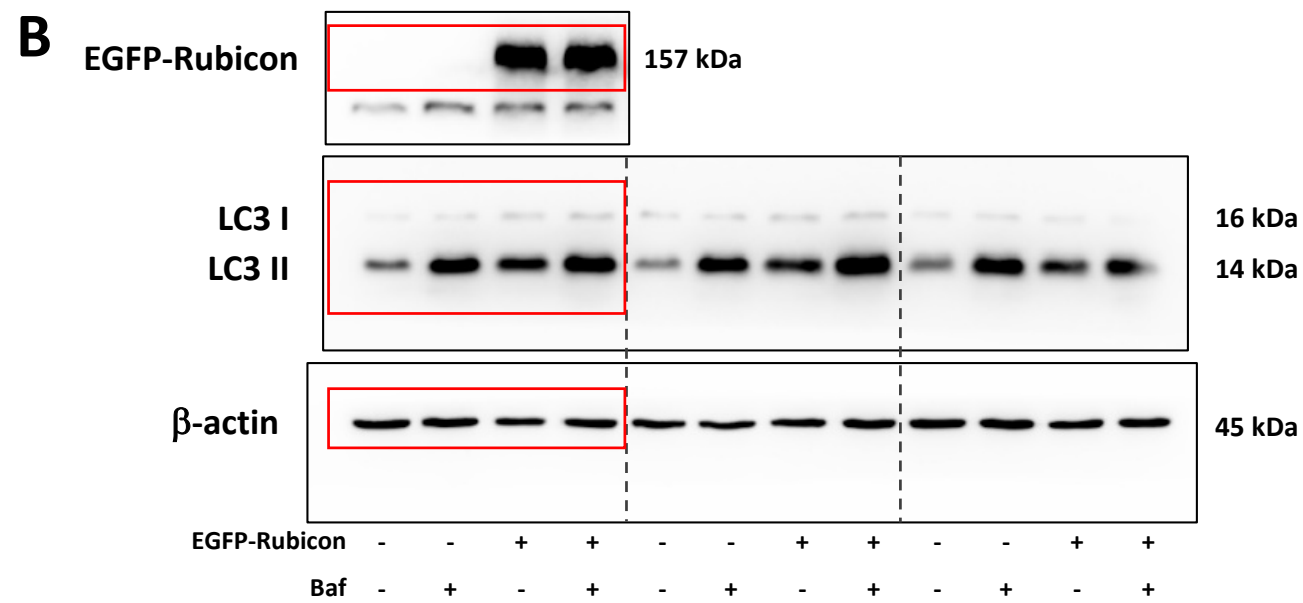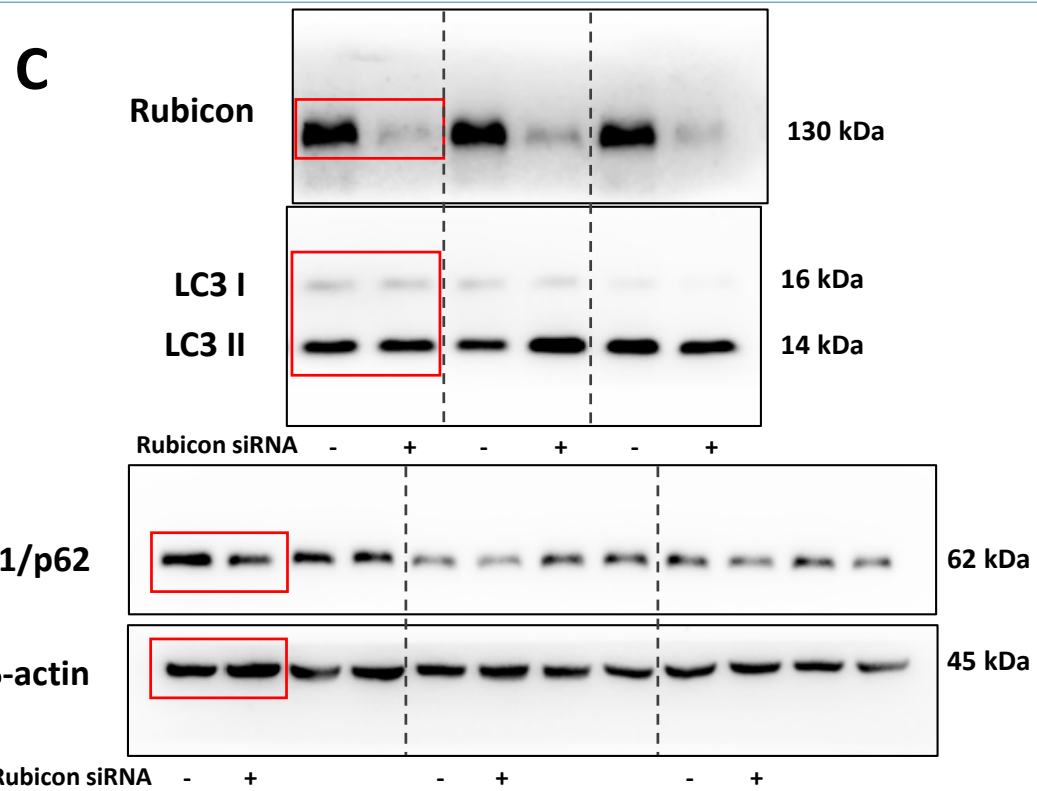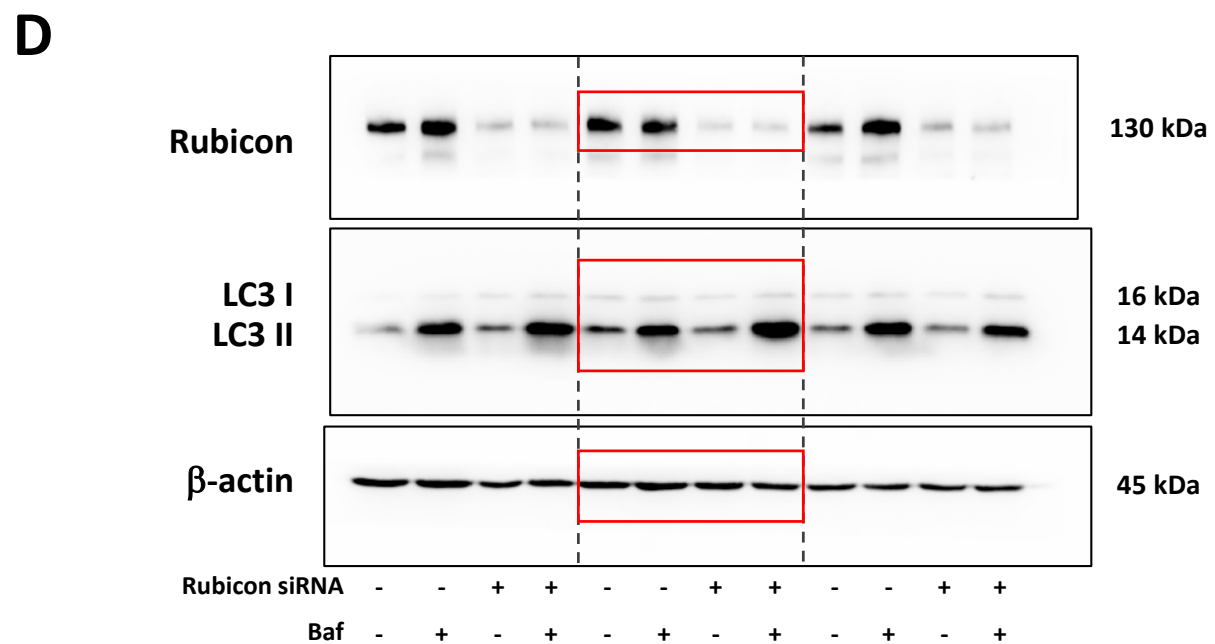

Figure S6

**E**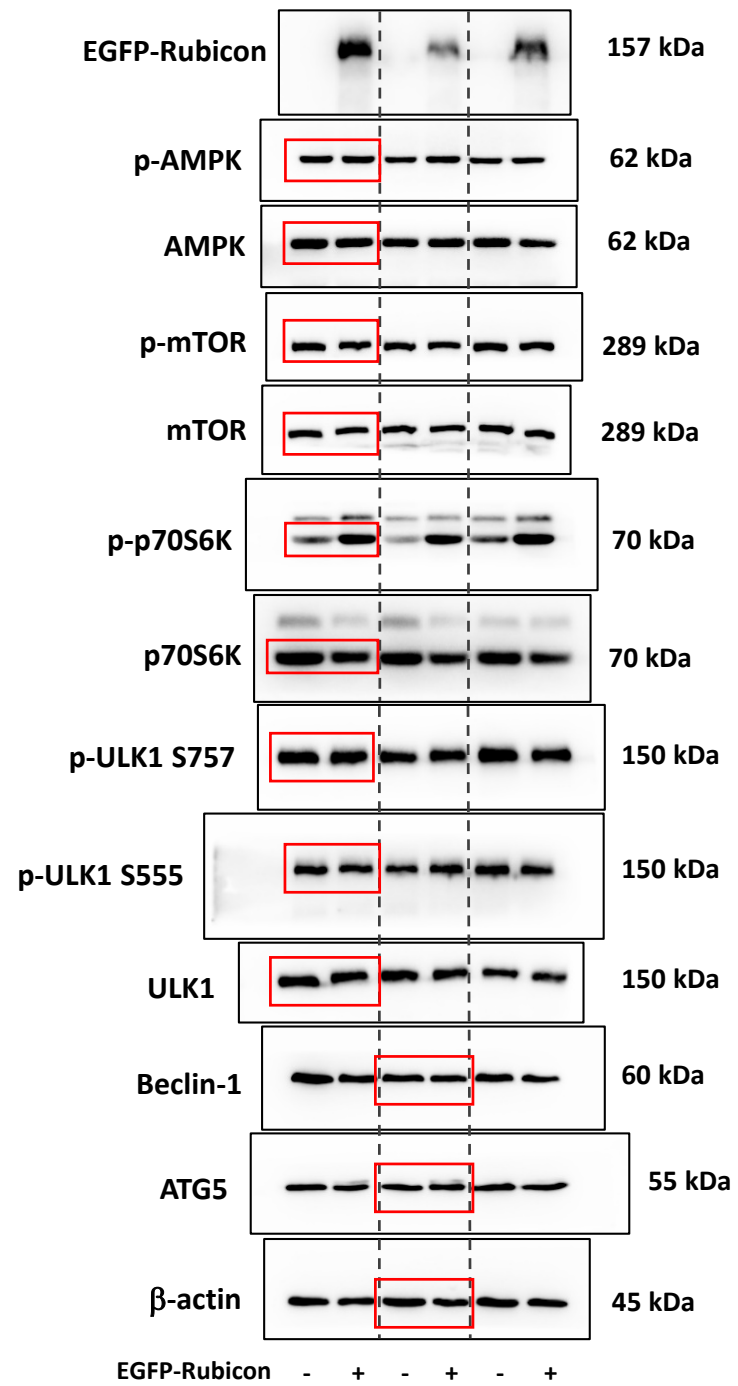**F**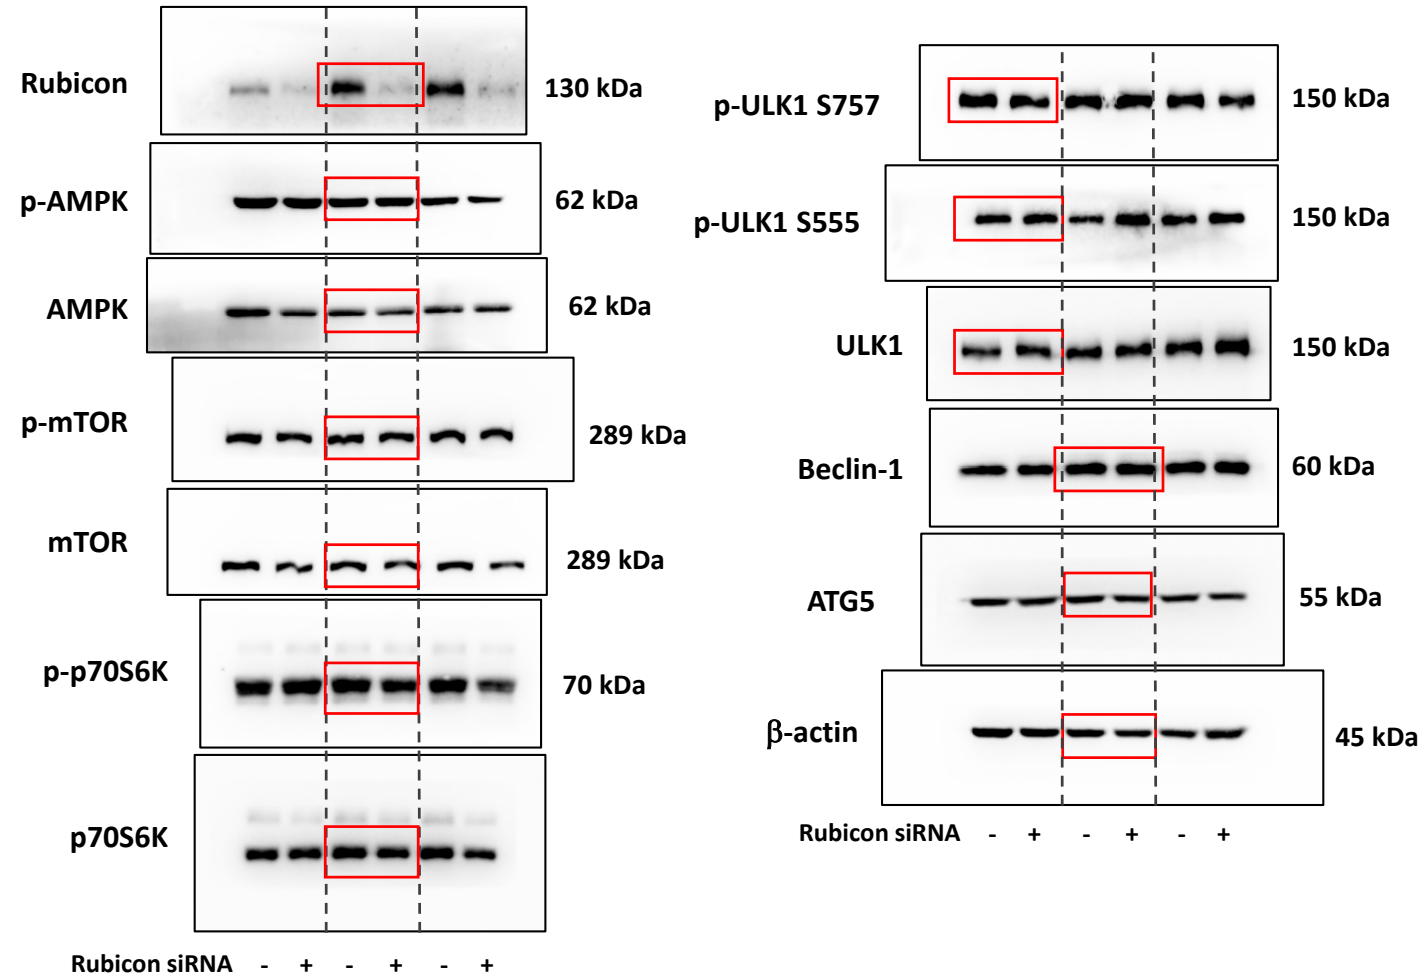**Figure S6 (Continued)**

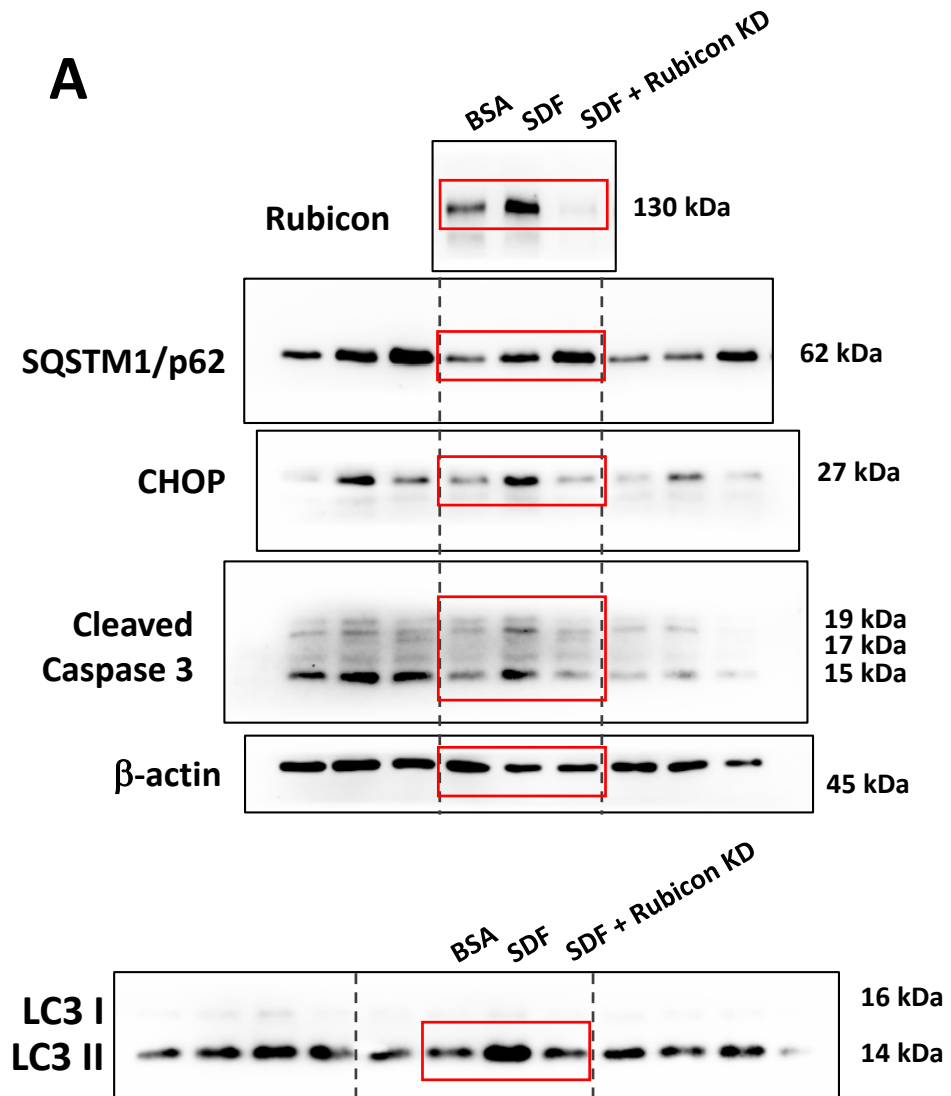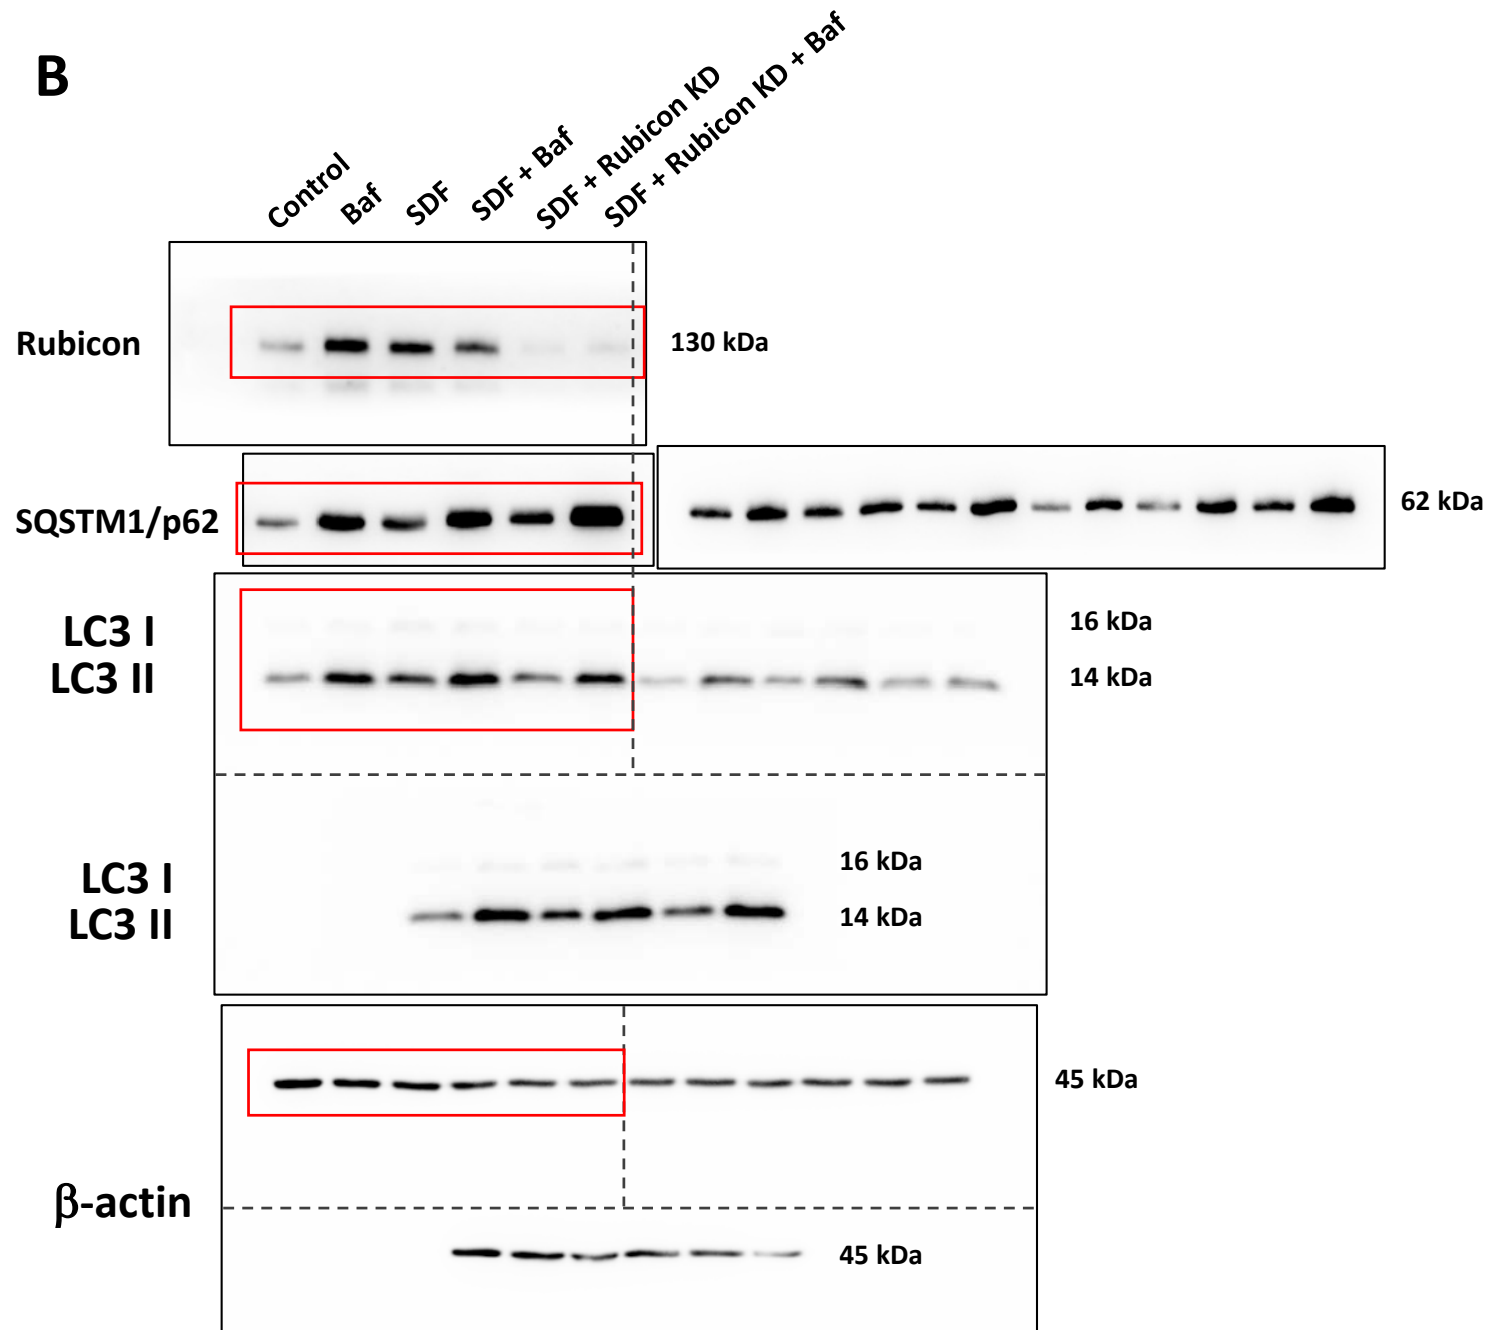

Figure S7

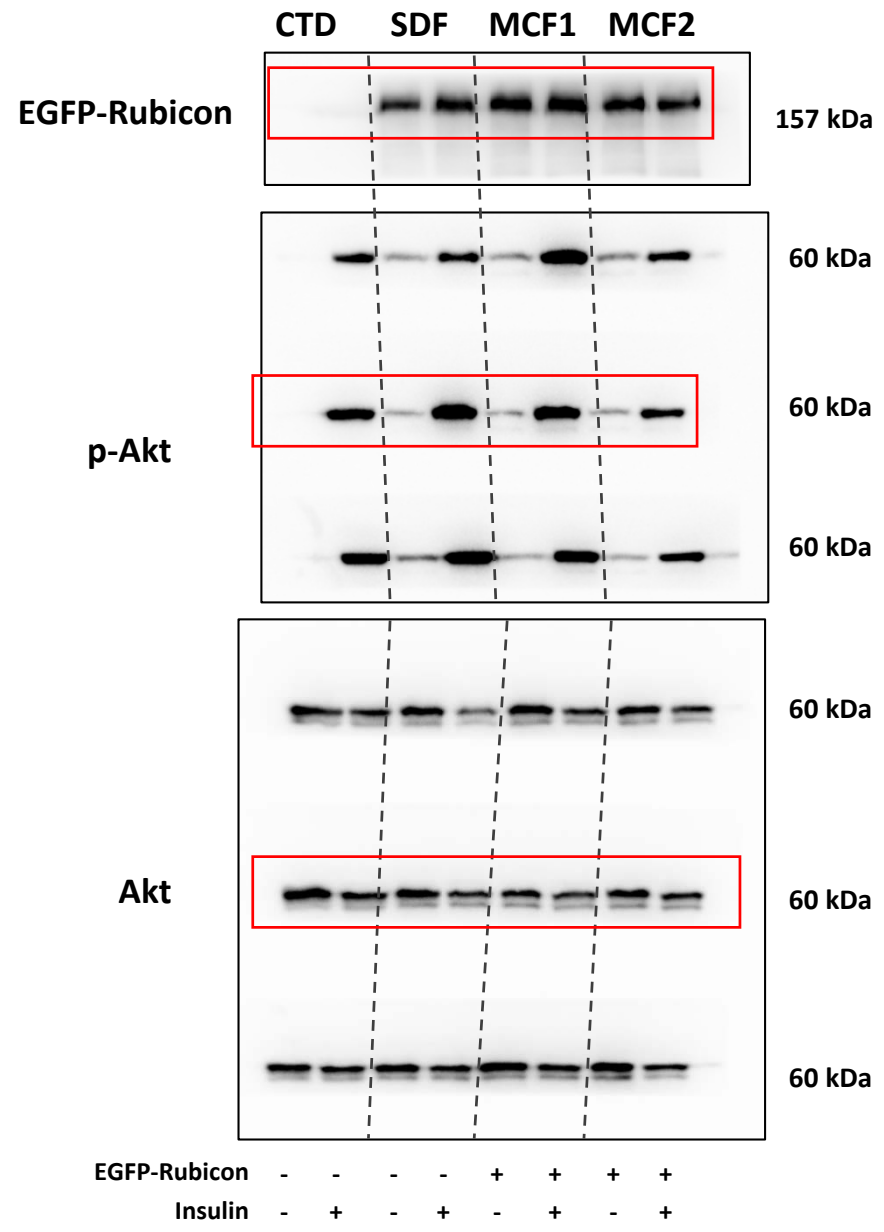

**Figure S7 (Continued)**

**C**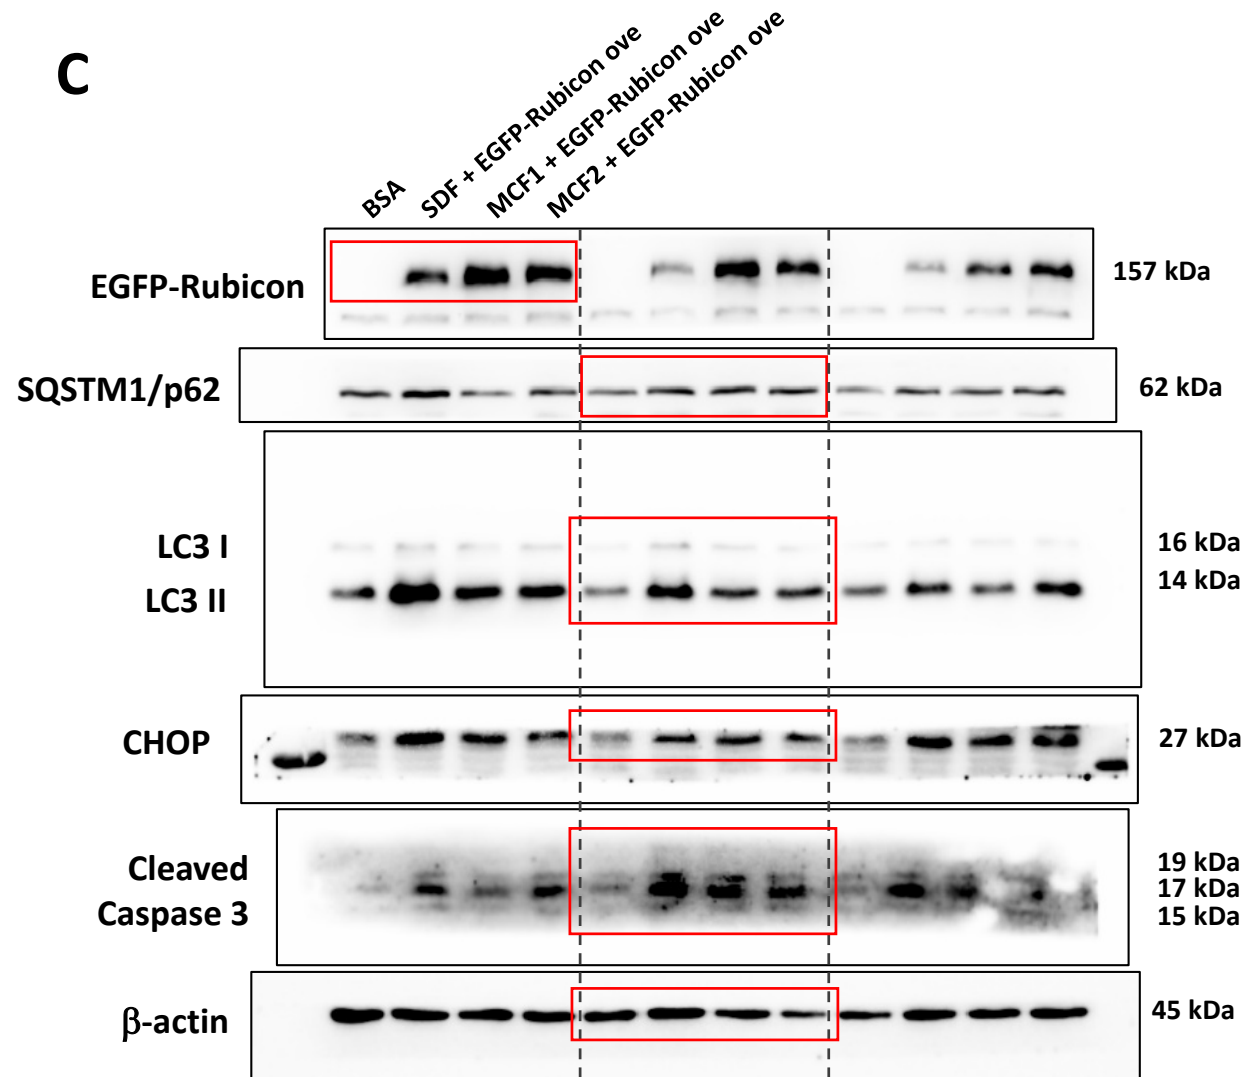**D**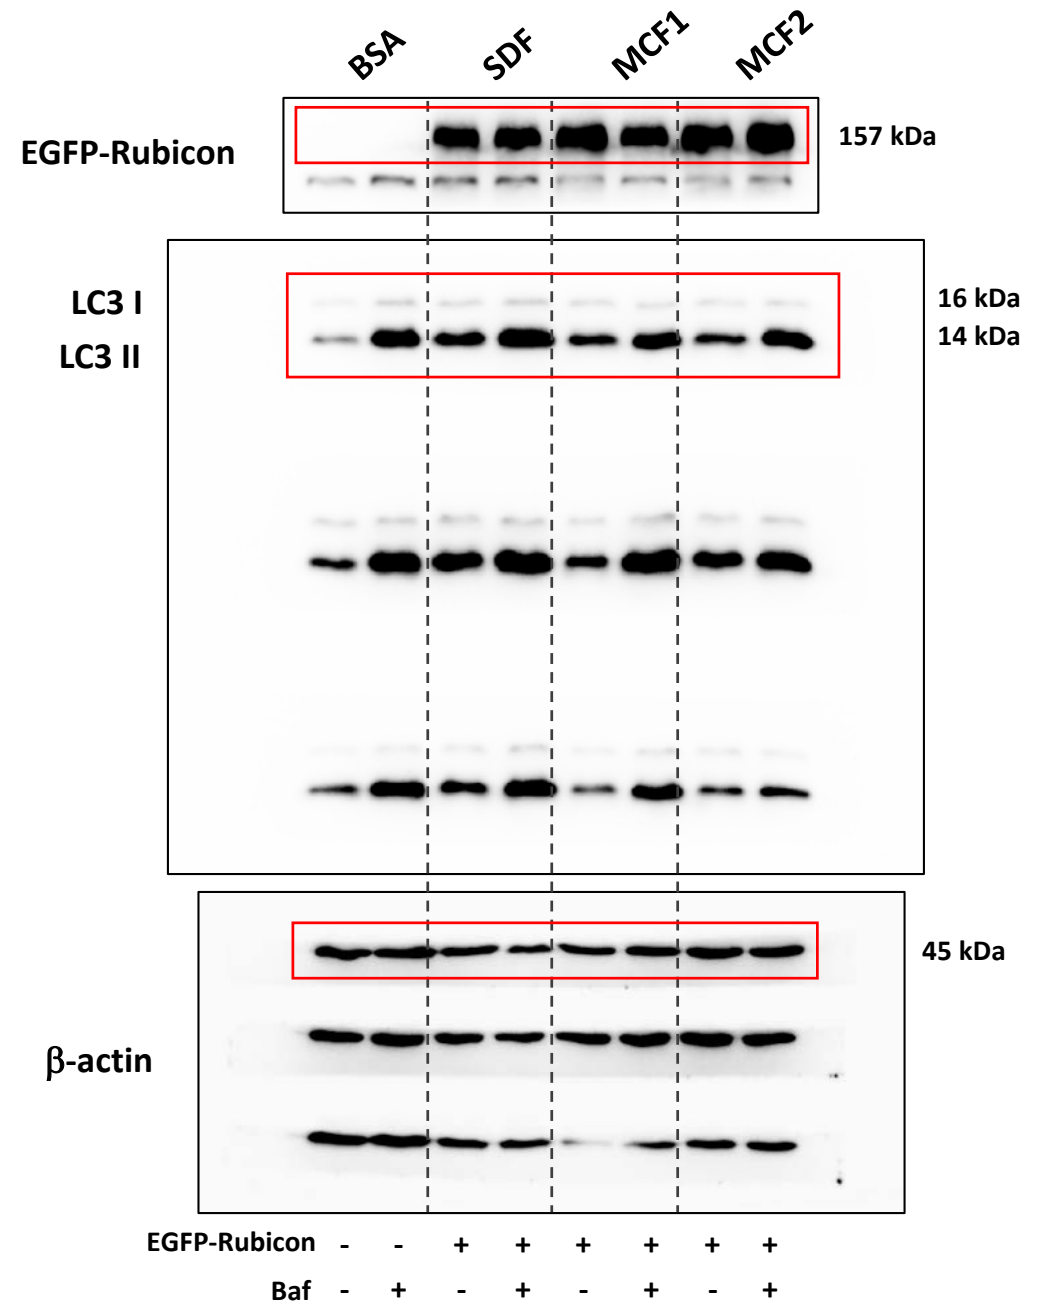

Figure S7 (Continued)



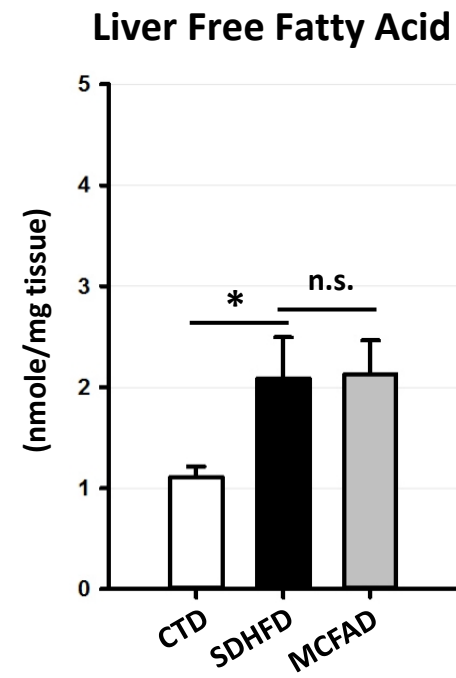

Figure S8

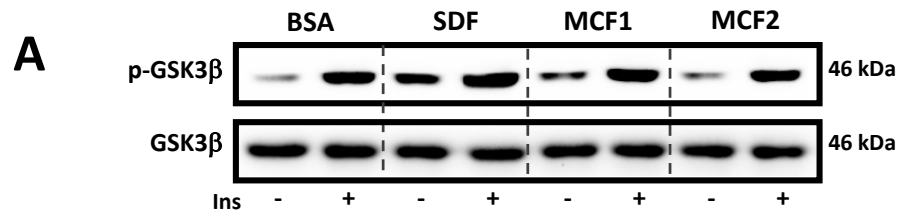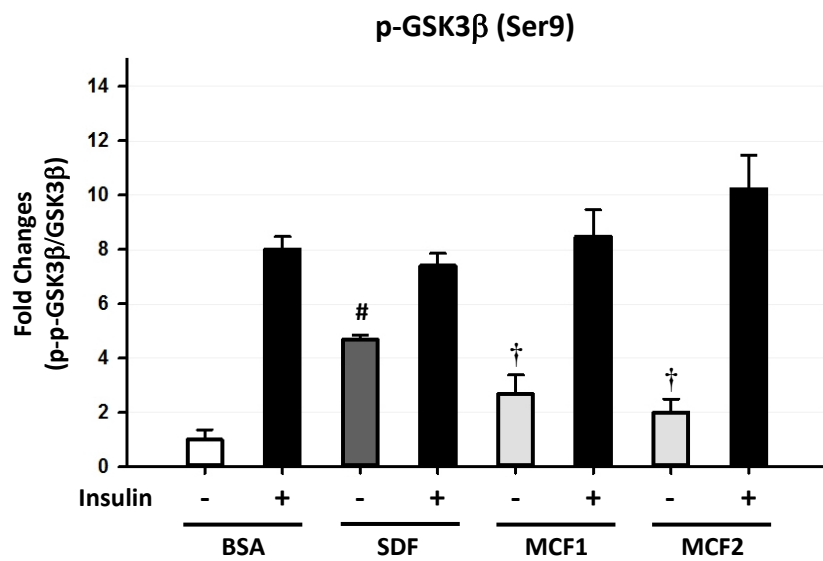

**B** Insulin-Stimulated GSK-3 $\beta$  Phosphorylation (Ser9)

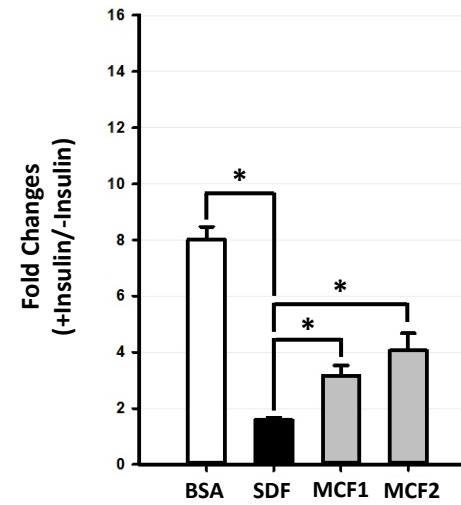

Figure S9
